# Supplementary material for: A tumor-targeted theranostic nanomedicine with strong absorption in the NIR-II biowindow for image-guided multi-gradient therapy
Source: Royal Society of Chemistry journal article supplement (doi:10.1039/d0tb01915a), 2020-01-01
Supplement: d0tb01915a1.pdf [file d0tb01915a1.pdf]

# **A Tumor-targeted Theranostic Nanomedicine with strong absorption in the NIR-II Biowindow for Imaging-Guided Multi-gradient Therapy**

Qi Chen,<sup>a, #</sup>, Ziliang Zheng <sup>a, #</sup>, Xiaojing He <sup>a, #</sup>, Shuo Rong <sup>a</sup>, Yufei Qin <sup>a</sup>, Xiaoyang Peng <sup>a</sup>, and  
Ruiping Zhang<sup>b, \*</sup>

<sup>a</sup> Department of biochemistry and molecular biology, Shanxi Medical University, Taiyuan 030001, China

<sup>b</sup> Department of Radiology, third hospital of Shanxi Medical University, Taiyuan 030032, China

\* Corresponding authors. Email: zrp\_7142@sxmu.edu.cn (R. Zhang).

# These authors contributed equally to this work.

## Supporting Figures

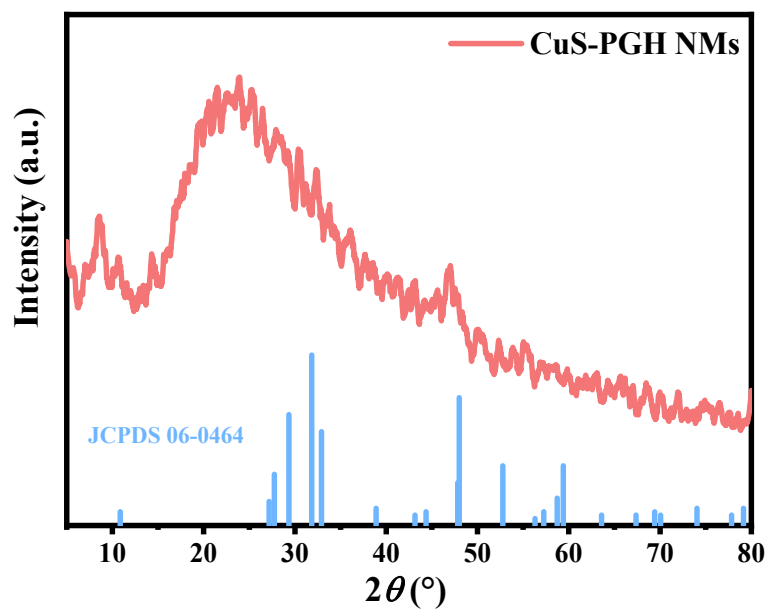

**Figure S1.** XRD pattern of CuS-PGH NMs.

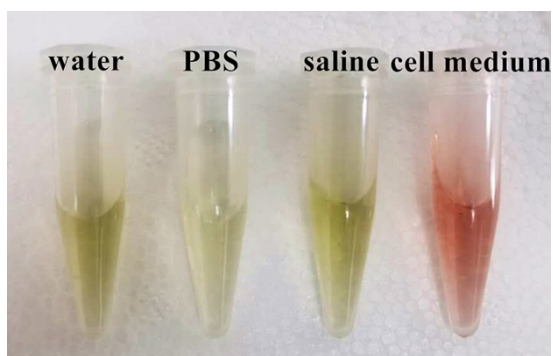

**Figure S2.** Digital photos of CuS-PGH NMs (1 mg/mL) in water, PBS, saline and cell medium after 24 h.

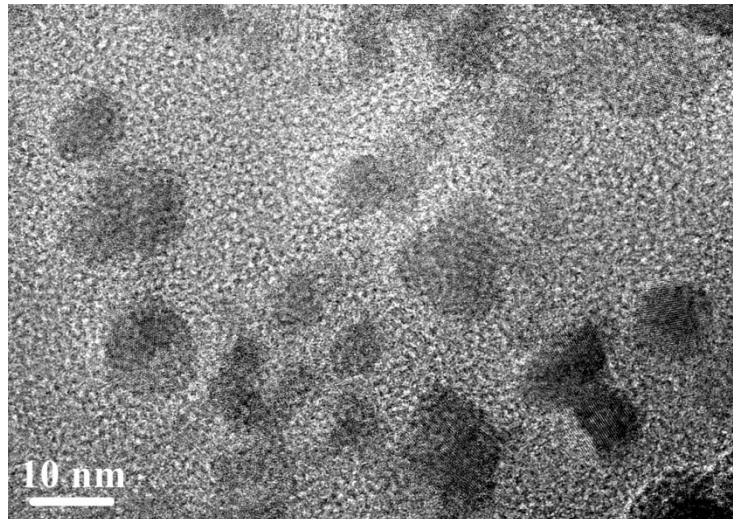

**Figure S3.** Representative TEM image of CuS.

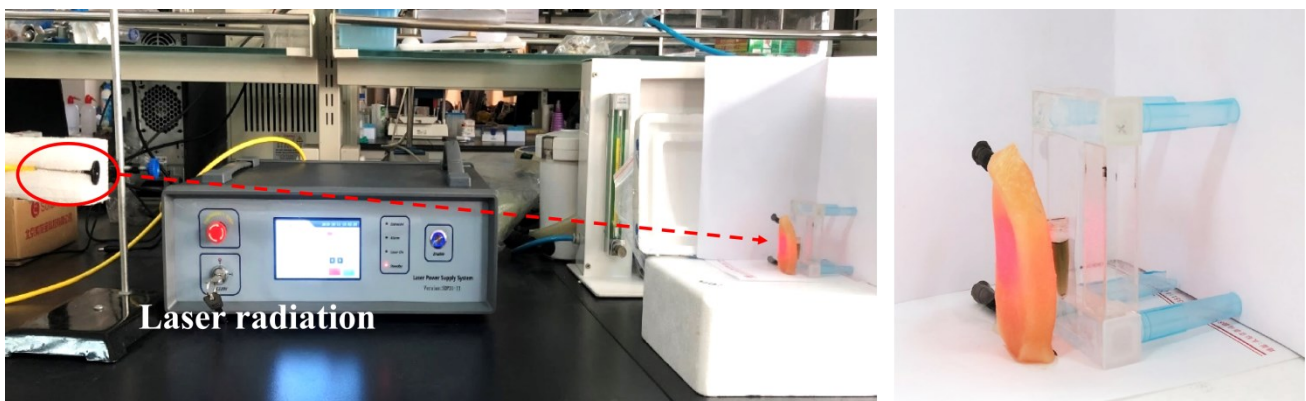

**Figure S4.** Photograph of the deep-tissue NIR-II PTT experimental samples setup.

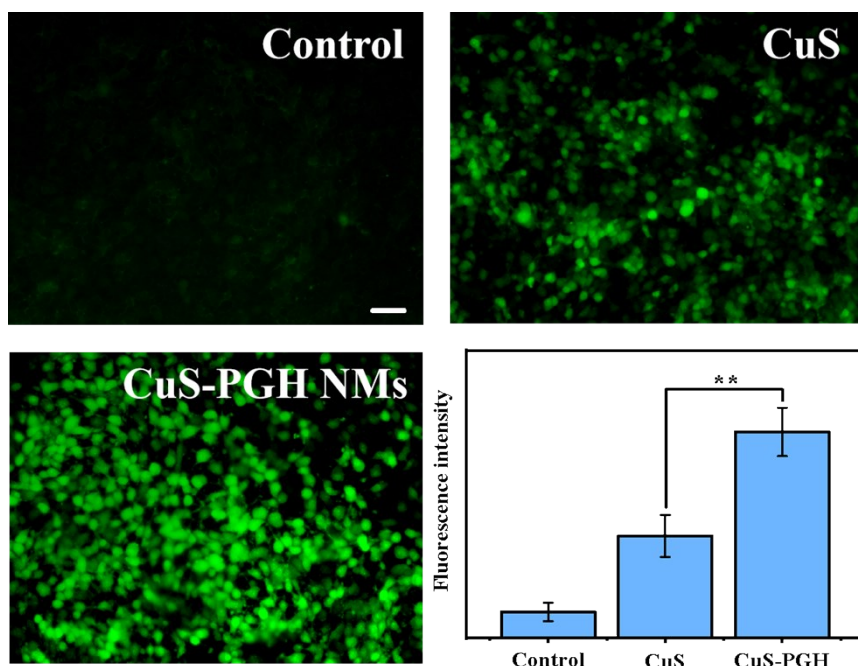

Figure S5. Intracellular ROS detection after 4T1 cells treatment with the samples. The scar bar was 100  $\mu\text{m}$ .

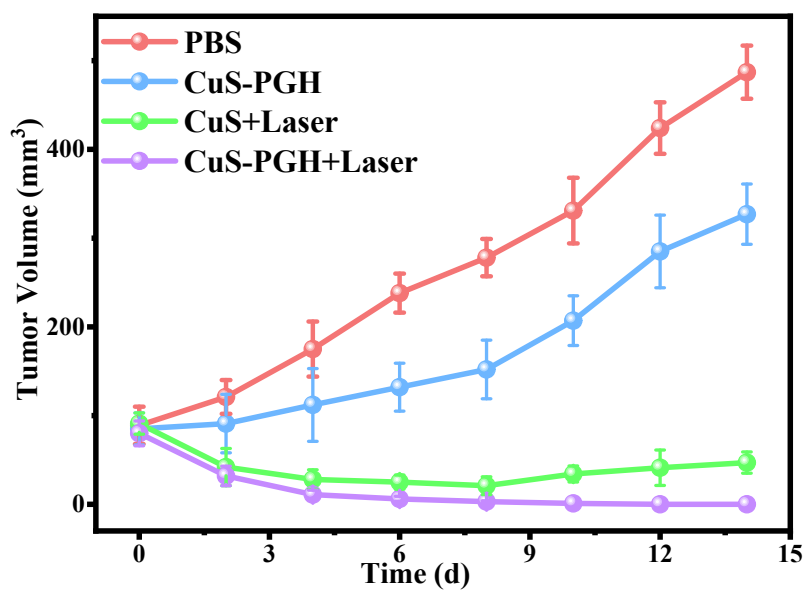

Figure S6. Tumor growth curves of mice from different groups after various treatments.

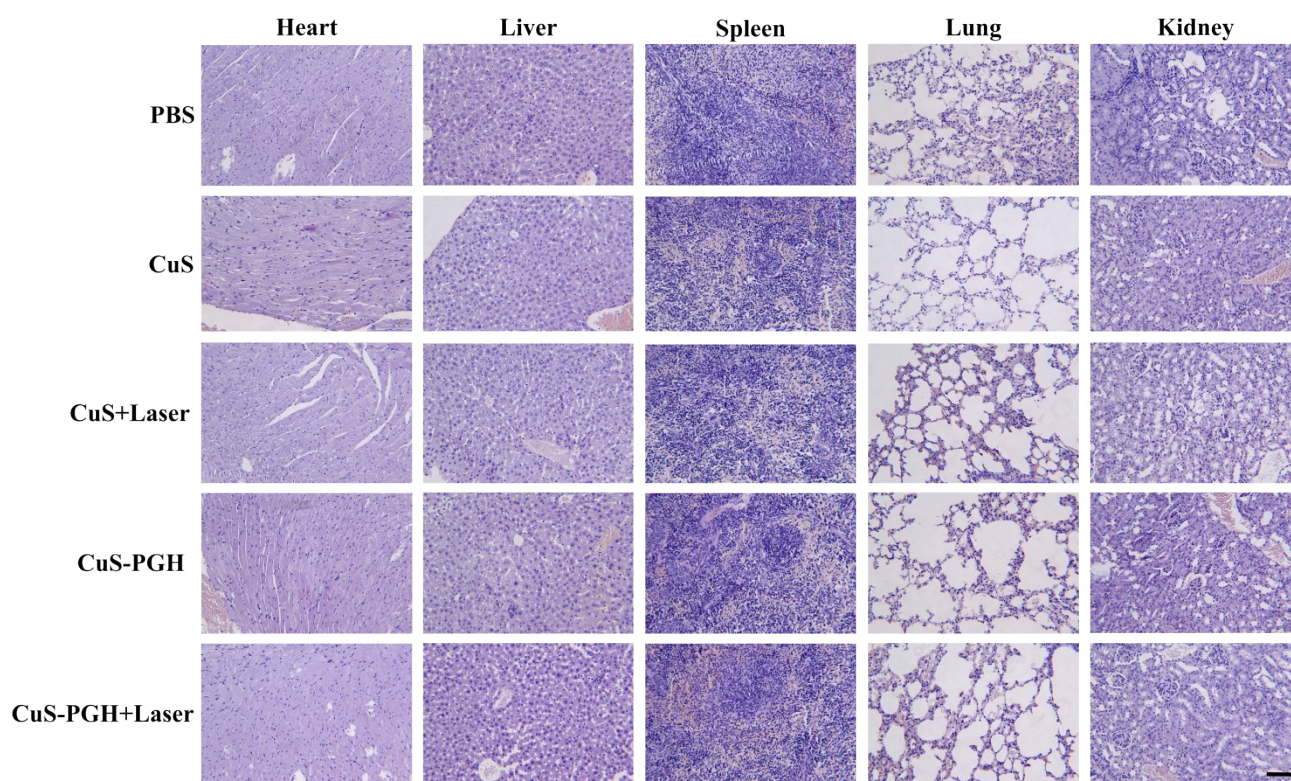

**Figure S7.** H&E staining of major organ tissues collected from mice at the end of treatment. Scale bar is 200  $\mu\text{m}$ .
